# Supplementary material
Source: MDPI journal article supplement (https://www.mdpi.com/2076-3417/11/1/379)

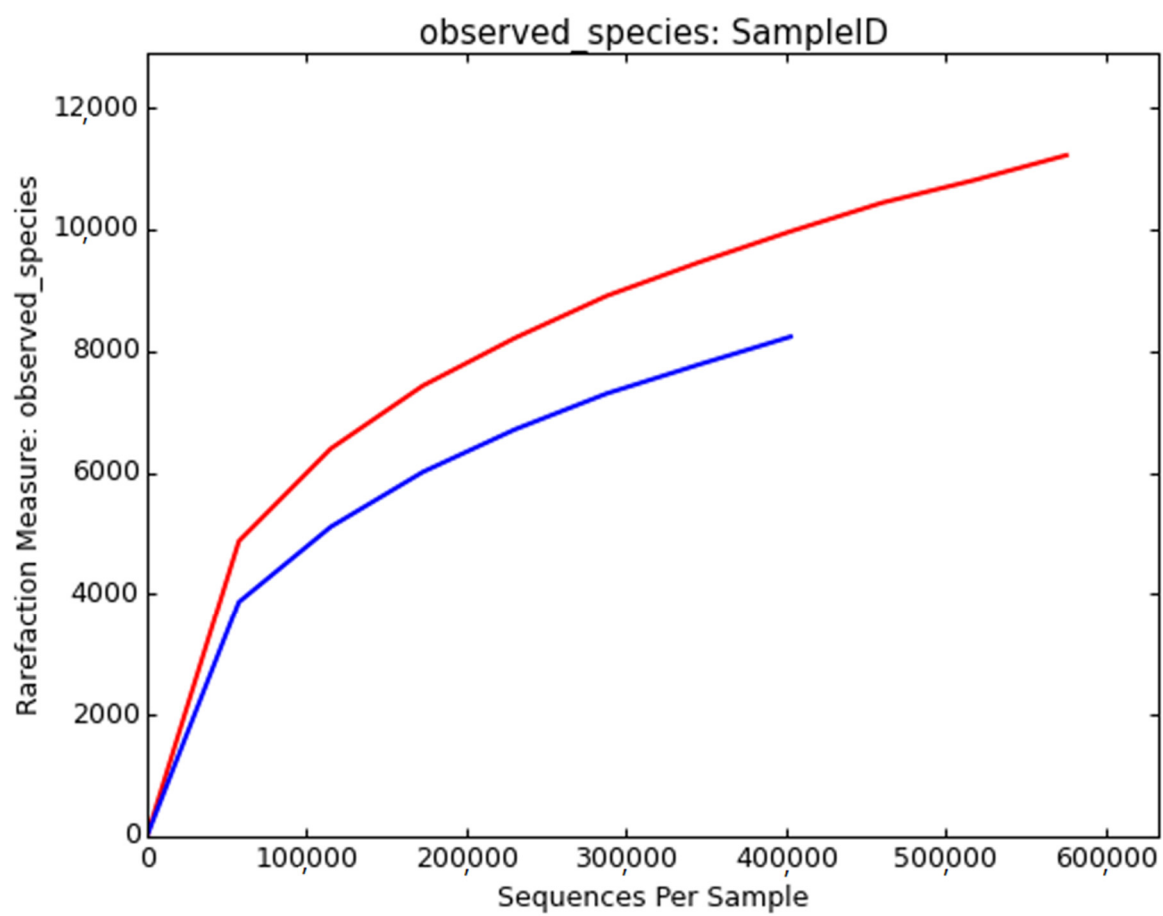

Figure S1. Rarefaction curve of bacterial communities.

Supplement: s1 [file s1]
